# Supplementary material for: Vascular Behçet’s syndrome: an update
Source: Springer Nature journal article supplement (doi:10.1007/s11739-018-1991-y), 2018-11-29
Supplement: MOESM1 [file 16304548]

**Supplementary table 1:** Characteristics of included studies evaluating the treatment of vascular involvements in Behçet’s syndrome.

| **First author, Title, Journal. Year, Reference** | **Study design** | **Period, Setting** | **Population,**  **Clinically relevant characteristics** | **Intervention** |
| --- | --- | --- | --- | --- |
| **VENOUS** |  |  |  |  |
| **Deep venous thrombosis (DVT)** |  |  |  |  |
| Ahn JK. Treatment of venous thrombosis associated with Behcet’s disease: immunosuppressive therapy alone versus immunosuppressive therapy plus anticoagulation. Clin Rheumatol 2008;27:201–5.[doi:10.1007/s10067-007-0685-z](http://dx.doi.org/10.1007/s10067-007-0685-z) | Retrospective OS | 1995 – 2006; South Korea.  Follow-up from DVT: 50 ± 29 months. | 37 subjects with DVT; age 35 ± 9; 32 male.  DVT: lower limbs (n=27); upper limbs (n=10).  Concomitant: pulmonary thrombosis (n=4), arterial aneurysm (n=3), arterial occlusion (n=2). | Only immunosuppressants (+CCS) (n=16; group1)  vs immunosuppressants (mainly azathioprine, + CCS)+ anticoagulants (warfarin) (n=17; group2)  vs only anticoagulants (n=4; group3).  Colchicine was given in all 37 subjects. |
| Alibaz-Oner F. Behçet disease with vascular involvement: effects of different therapeutic regimens on the incidence of new relapses. Medicine 2015;94:e494.[doi:10.1097/MD.0000000000000494](http://dx.doi.org/10.1097/MD.0000000000000494) | Retrospective OS | 15 rheumatology centers in Turkey. | 260 subjects with DVT; age 32 ± 10; 224 male.  34/88 had thrombophilic factors.  DVT: only venous 8n=220); only arterial (n=21); both (n=11); cardiac involvement (n=8).  Rare vascular involvements: Budd-Chiari (n=3); pulmonary aneurysm (n=29); pulmonary thrombosis (n=7); vena cava involvement (n=22). | After the first event: CCS to 100% subjects; immunosuppressants to 88.8% (azathioprine n=166; cyclophosphamide n=74; infliximab n=18; methotrexate n=2); anticoagulants to 59.8%.  Median duration of treatment: 22 (1-204) for immunosuppressants; 13 (1-204) for anticoagulants. |
| **Deep or superficial venous thrombosis (DVT and/or SVT)** |  |  |  |  |
| Desbois AC. Immunosuppressants reduce venous thrombosis relapse in Behçet’s disease. Arthritis Rheum 2012;64:2753–60.[doi:10.1002/art.34450](http://dx.doi.org/10.1002/art.34450) | Retrospective OS | 1975 – 2009; Department of Internal Medicine of Groupe Hospitalier Pitie-Saletriere (Paris, France). | 296 subjects with venous thrombosis; age 30 (24-36); 217 male.  586 thrombosis: superficial (n=26), deep (n=560), multiple (n=207).  Location: lower limbs (n=306), central veins (n=77), pulmonary embolism (n=57), inferior vena cava (n=44), superior vena cava (n=19), upper limbs (n=17), Budd-Chiari syndrome (n=14), cervical veins (n=13), right ventricle (n=6), right atrium (n=5), others (n=28). | Anticoagulants (n=291, median duration 10 (4-24) months)  and/or  immunosuppressants (n=137, median duration 3 (1-5) years; cyclophosphamide (n=47), azathioprine (n=95), methotrexate (n=8), chlorambucil (n=20), cyclosporine (n=8), infliximab (n=2), interferon-alpha (n=4))  and/or  CCS (n=185).  Portosystemic shunting (n=3), bypass for superior vena cava thrombosis (n=3), thrombectomy for renal thrombosis (n=1) |
| Emmi G. Adalimumab-Based Treatment Versus Disease-Modifying Antirheumatic Drugs for Venous Thrombosis in Behçet's Syndrome: A Retrospective Study of Seventy Patients With Venous Vascular Involvement. [Arthritis Rheumatol.](https://www.ncbi.nlm.nih.gov/pubmed/29676522) 2018 Apr 20. doi: 10.1002/art.40531. | Retrospective OS | 2009 – 2017; Behçet Centre of the University Hospital of Florence.  Follow-up: 26±23 months. | 70 subjects with DVT and/or SVT of the upper or lower limbs; 37 male; age 43±11 in adalimumab (ADA) +/- DMARDs group vs 54±32 in only DMARDs group.  Unilateral SVT(n=17), bilateral SVT (n=13), unilateral DVT (n=34), bilateral DVT (n=18). | ADA +/- DMARDs (n=35; only ADA (n=27), ADA+azathioprine (n=7), ADA+methotrezate (n=1))  vs  only DMARDs (n=35; azathioprine (n=18), cyclosporine (n=9), cyclophosphamide (n=5), methotrexate (n=3)).  Co-treatment with anticoagulants (warfarin): 11 subjects in the ADA+/-DMARDs group vs 10 subjects in the only DMARDs group. |
| **Vena cava thrombosis (VCT)** |  |  |  |  |
| [Hamzaoui A](https://www.ncbi.nlm.nih.gov/pubmed/24598446). Vena cava thrombosis in Behçet's disease. [Anadolu Kardiyol Derg.](https://www.ncbi.nlm.nih.gov/pubmed/24598446) 2014 May;14(3):292-3. doi: [10.5152/akd.2014.5042](http://dx.doi.org/10.5152/akd.2014.5042). | Retrospective medical chart review | 1989-2009; La Rabta University Hospital in Tunis, Tunisia. | 29 subjects with vena cava thrombosis (VCT); age 25 (18-38) years; all male.  Isolated superior VCT: 12/29. Isolated inferior VCT: 11/29; two localizations: 6/29. | Anticoagulants (29/29).  CCS (3 pulses of methylprednisolone 1gr /day and then Prednisolone: 1mg/kg/day; mean duration: 24 month) and immunosuppressants (22/29) (cyclophosphamide (n=20); azathioprine (n=2)). |
| **Budd-Chiari syndrome (BCS)** |  |  |  |  |
| Seyahi E. An outcome survey of 43 patients with  Budd-Chiari syndrome due to Behçet’s syndrome followed up at a single, dedicated  center. Semin. Arthritis Rheum 2015; 44: 602-9 | Retrospective chart review + survey. | Diagnosed between 1977 – 1990; outcome evaluation between 2012-2013 (survey); Cerrahpasa Medical Faculty (Istanbul, Turkey).  Median follow-up 9 (6-15) years. | 43 subjects with Budd-Chiari syndrome (BCS); age 30 ± 9; 40 male.  Venous involvement (n=43, 100%), arterial (n=14, 33%).  Treatment at BCS diagnosis:  Group 1: no treatment (n=9), colchicine +/- aspirin/warfarin (n=19), azathioprine +/- prednisolone (n=5).  Group 2: no treatment (n=9, of whom 1 was off-treatment for 1 year), azathioprine (n=1).  Group 1 (subjects with liver-related symptoms and signs, n=33)  vs Group 2 (subjects with major vessel disease, n=10).  Level of the hepatic venous outflow obstruction:  Group 1: inferior vena cava (IVC) and hepatic veins (n=22), IVC alone (n=8), hepatic veins alone (n=1).  Group 2: IVC and hepatic veins (n=3), IVC alone (n=4), hepatic veins alone (n=3).  Overall vascular involvement:  Group 1: IVC thrombosis (n=30), hepatic vein thrombosis (n=23), lower extremities DVT (n=21), superior vena cava (SVC) thrombosis (n=11), pulmonary artery involvement (n=7), dural sinus thrombosis (n=4).  Group 2: IVC thrombosis (n=9), hepatic vein thrombosis (n=6), lower extremities DVT (n=8), SVC thrombosis (n=1), pulmonary artery involvement (n=4), dural sinus thrombosis (n=2). | Medical treatment following BCS:  Group 1: immunosuppressants (n=26/33; cyclophosphamide (n=23), azathioprine (n=3), median duration 6 (4-13 months); + CCS (n=24)); anti-TNF agents (n=4, treatment-resistant patients, 3 infliximab, 1 etanercept); vascular intervention (n=3); thrombolytic treatment with streptokinase for 48 hours (n=4); low-molecular-weight heparin for 2-3 weeks and then warfarin for less than 1 year (n=12).  Group 2: immunosuppressants + CCS (n=10/10; cyclophosphamide (n=8), azathioprine (n=1), interferon (n=1), median duration 11 (6-12 months); infliximab (n=1); thrombolytic treatment with streptokinase (n=1); anticoagulants (n=2). |
| Seyahi E. Infliximab in the treatment of hepatic  vein thrombosis (Budd-Chiari syndrome) in three patients with Behcet’s  syndrome. Rheumatology 2007; 46:1213 – 1214 | Case series | Cerrahpasa Medical Faculty (Istanbul, Turkey). | 3 subjects with severe BCS.  Case 1: 12 years, male; PAA.  Case 2: 28 years, male; BCS presenting with ascites and hepatosplenomegaly.  All three hepatic veins and suprahepatic segment of the IVC were thrombosed.  Case 3: 15 years, male; BCS + abdominal swelling; pustules at the intravenous needle insertion sites, bilateral papilloedema, ascites and hepatomegaly. Thrombosis in the right hepatic vein and in the IVC. | Case 1: prednisolone (1g/kg/day) + cyclophosphamide (1g/month).  Case 2: prednisolone (1g/kg/day) + cyclophosphamide (1g/month).  Case 3: infliximab (5mg/kg). |
| **Intracardiac thrombus (ICT)** |  |  |  |  |
| Ben Ghorbel I. Intracardiac thrombus in Behçet's disease. [Reumatismo.](https://www.ncbi.nlm.nih.gov/pubmed/27981817) 2016 Dec 16;68(3):148-153. doi: [10.4081/reumatismo.2016.887](http://dx.doi.org/10.4081/reumatismo.2016.887). | Case report | Tunisia | 8 subjects with intracardial thrombus (ICT); mean age 31 years; all male.  Case 1: 38 years, already diagnosed with BS, recurrent DVT of lower limbs, and pulmonary embolism.  Case 2: 39 years, multiple PAA, multiple infarction and right intraventricular thrombus. Diagnosed with BS.  Case 3: 25 years, pulmonary embolism. 3 years later, recurrent right auricular thrombus, diagnosed with BS.  Case 4: 30 years, BS, arterial thrombosis  and ocular involvement, already treated with immunosuppressants, steroids and long-term oral anticoagulation. Abdominal ascites, inferior vena cava thrombosis, hepatic veins thrombosis, lower limbs thrombosis.  Case 5: 29 years, history of DVT on lower limbs. Superior and inferior vena cava thrombosis, left basal PE, intra auricular thrombus, mild pericardial  Effusion. Floating thrombus in the right  Atrium. Diagnosis of BS.  Case 6: 33 years, history of cerebral vein thrombosis. Thrombosed aneurysm of the inferior lobar pulmonary artery, and right intraventricular thrombus.  Case 7: 28 years, non-ST elevation  myocardial infarction; right coronary artery aneurysm, upstream stenosis; right intraventricular thrombus. Diagnosis of BS.  Case 8: 25 years, diagnosed with BS. Right  intraventricular thrombosis and PE. | Case 1: 60 mg/day prednisone, 1 mg/day colchicine, and 4 mg/day acenocoumarol.  Case 2: High doses of prednisone and colchicine + monthly pulses of cyclophosphamide (then switched to azathioprine). Heparin therapy, followed by oral anticoagulation.  Case 3: pulmonary embolism treated with thrombectomy  and oral anticoagulation. 3 years later (BS diagnosis): monthly intraintravenous cyclophosphamide pulses (replaces with azathioprine after 1 year), prednisone, and colchicine, and acenocumarol.  Case 4: monthly pulses of cyclophosphamide, prednisone, colchicine, and acenocoumarol.  Case 5: intravenous heparin, then acenocumarol. Combination of azathioprine, prednisone, and colchicine.  Case 6: oral anticoagulation, steroids, and colchicine. After recurrence, added cyclophosphamide (then replaced with azathioprine).  Case 7: thrombolytic therapy; anti ischemic treatment  (b blockers, inhibitor of angiotensin converting enzyme) + anticoagulation. Prednisone and monthly pulses of cyclophosphamide (then replace with azathioprine).  Case 8: thrombectomy and oral anticoagulation. At time of recurrence: Cyclophosphamide, pulsed CCS and oral anticoagulation. |
| Wang H. Intracardiac thrombus in patients with Behcet's disease: clinical correlates, imaging features, and outcome: a retrospective, single-center experience. Clin Rheumatol. 2016 Oct;35(10):2501-7. doi: 10.1007/s10067-015-3161-1. | Retrospective OS | 2003-2013; Peking Union Medical College hospital, China. | 12 subjects; age 33.5 (21.3 – 38.8) years; 9 male.  ICT; 5 at single site, 7 at multiple site. | First-line complete surgical excision (n=3, all). Of them:  2 were treated with warfarin, prednisone, and cyclophosphamide. 1 was treated only with aspirin, then he was diagnosed with BS and treated with warfarin, prednisone, cyclophosphamide, and thalidomide.  First-line anticoagulant + immunosuppressants + CCS (n=9). |
| **Cerebral venous thrombosis (CVT)** |  |  |  |  |
| Saadoun D. Cerebral venous thrombosis in Behçet’s disease. Arthritis Rheum 2009;  15(61):518e26. | Retrospective OS | 1974-2006; Department of Internal Medicine and Neurology; University Hospital Hospitalier Pitie-Saletriere (Paris, France). | 64 subjects with cerebral venous thrombosis (CVT); age at BD diagnosis 26±8; 42 male.  Site of CVT occlusion: Superior sagittal sinus (n=41), transverse sinuses (n=39), deep cerebral vein (n=4), cavernous sinuses (n=3).  Follow-up: 8 ± 7 years. | BD treatment: CCS (n=54), immunosuppressants (n=32; mainly cyclosphorine and azathioprine), colchicine (n=59).  Treatment of CVT: anticoagulants (n=62; in 48 concomitant treatment with CCS; 32 in concomitant with immunosuppressants) or aspirin+CCS (n=2).  Duration of treatment with oral anticoagulant: <1 year (n=6), 1-3 years (n=15), >3 (n=41). |
| Shi J. Cerebral venous sinus thrombosis in Behçet's disease: a retrospective case-control study. [Clin Rheumatol.](https://www.ncbi.nlm.nih.gov/pubmed/28612244) 2018 Jan;37(1):51-57. doi: [10.1007/s10067-017-3718-2](http://dx.doi.org/10.1007/s10067-017-3718-2). | Retrospective OS | 2004-2016; China  Median follow-up: 7 (0.7 – 88.8) months. | 21 patients with cerebral venous sinus thrombosis (CVST); age 30 ± 10 years; 10 male.  Intracranial hypertension: 17/19.  Multiple sinus occlusions: 14/21; single sinus occlusions: 7/21.  Other intracranial thrombi: deep cerebral vein (n=2), ophthalmic vein (n=1), jugular vein (n=1), cerebral haemorrhage/infarction (n=4).  Extra cranial thrombosis: lower extremity veins (n=10), upper extremity vein (n=1), pulmonary artery (n=2). | CCS (21/21); pulsed methylprednisolone (7/21).  Immunesuppressants (20/21): cyclophosphamide (n=17), thalidomide (n=11), cyclosporine A (n=5), azathioprine (n=4), hydroxychloroquine (n=4), chloroquine (n=1).  Intrathecal injection of dexamethasone (7/21).  Intrathecal injection of methotrexate (4/21).  Long-term anticoagulants (20/21).  Thrombolytic therapy (3/21). |
| Uluduz D. Behçet's disease as a causative factor of cerebral venous sinus thrombosis: subgroup analysis of data from the VENOST study. Rheumatology (Oxford). 2018 Jul 9. doi: 10.1093/rheumatology/key153. | Retrospective and prospective  national multicentre OS. | 2000-2015; 35 centres. | 108 subjects with CVST; age 35 ± 11 years; 74 male.  Parenchymal involvements: infarction (n=23); infections (n=4).  History of VTE: cerebral (n=7), DVT (n=12). | Within the first month of therapeutic intervention,  71.3% of patients were first treated with intravenous  pulse steroid for 3-5 days, and then alternated by tapering doses of an oral steroid while  a therapeutic dose of low-molecular-weight heparin  (100 IU/kgx2) was administered for 1 month. After  1 month, the same intervention group received warfarin  treatment for the remaining 5 months. For some of these  patients, unfractionated heparin within therapeutic doses  was preferred within the first 10 days rather than low-molecular-weight heparin.  23%of the patients were treated with  an anticoagulant without a steroid over the 6-month  period. Warfarin was the only drug used to continue treatment.7 patients who could not tolerate warfarin treatment received antiaggregant therapy. |
| **ARTERIAL** |  |  |  |  |
| **Pulmonary artery involvement (PAI)** |  |  |  |  |
| Hamuryudan V. Pulmonary arterial aneurysms in Behçet’s syndrome: a report of 24 cases. Br J Rheumatol 1994;33:48–51.[doi:10.1093/rheumatology/33.1.48](http://dx.doi.org/10.1093/rheumatology/33.1.48) | Retrospective chart review (registry) | 16-years registry; BS Research Centre, Cerrahpasa Medical Faculty (Istanbul, Turkey). | 24 subjects with pulmonary arterial aneurysms (PAA); age 30 ±11; 24 male.  Haemoptysis (n=23); Thrombophlebitis (n=21).  Previous treatment: immunosuppressives (n=24; azathioprine or cyclophosphamide; median treatment duration 2.1±2 years). | Treatments:  emergency surgery (n=4)  vs  azathioprine 2.5 mg/kg/day (n=1)  vs  cyclophosphamide 2.5mg/kg/day ± prednisolone (n=7)  vs  cyclophosphamide 1g/month ± prednisolone (n=10)  vs  lost to follow-up before treatment (n=2). |
| Hamuryudan V. Pulmonary artery aneurysms in Behçet syndrome. Am J Med 2004;117:867–70.[doi:10.1016/j.amjmed.2004.05.027](http://dx.doi.org/10.1016/j.amjmed.2004.05.027) | Retrospective chart review (registry) | 1992-2001; BS Research Centre, Cerrahpasa Medical Faculty (Istanbul, Turkey). | 26 subjects with PAA; age 33 ± 8; 25 male.  Haemoptysis (n=23);  DVT of the lower extremities (n=21); vena cava thrombosis (n=4); intracardiac thrombus (n=3); arterial aneurysms at other sites (n=4).  Thrombophlebitis (n=21). | Initial treatment with 3 pulses of methylprednisolone (1 g), followed by a combination of prednisolone (started at 1mg/kg/day, then tapered) and cyclophosphamide (2.5mg/kg/day until 1996, vs 1g/month for the first year and then every 2 months after 1996).  After 2 years, some patients stopped and other switched to azathioprine (2.5 mg/kg/day). |
| Hamuryudan V. Pulmonary artery involvement in Behçet׳s syndrome: Effects of anti-Tnf treatment. Semin Arthritis Rheum 2015;45:369–73.[doi:10.1016/j.semarthrit.2015.06.008](http://dx.doi.org/10.1016/j.semarthrit.2015.06.008) | Retrospective chart review | 1979 – 2014; Cerrahpasa Medical Faculty (Istanbul, Turkey). | 13 subjects with PAI; age 29 ±5.  Only PAA(n=3); isolated pulmonary artery thrombosis (PAT) (n=7); PAA+PAT (n=3).  Venous involvement (n=10); parenchymal central nervous system involvement (n=2), intracardiac thrombus (n=5), elevated systolic pulmonary artery pressure (n=5). | 3 pulses of methylprednisolone (1 g) followed by monthly pulses of 1 g cyclophosphamide and prednisolone 1 mg/kg/d (n=13; mean duration 8 ± 5 months) +/- azathioprine 2.5 mg/day (n=6; mean duration 9 ± 5.5 months).  Anti-TNF treatment: infliximab 5mg/kg every 6 weeks (n=12) or adalimumab 40 mg every other week (n=1) +/- azathioprine 2.5 mg/day (n=8) + CCS (n=13).  Mean duration of anti-TNF treatment: 19.9± 14.7 months. |
| Seyahi E. Pulmonary artery involvement and associated lung disease in Behçet disease: a series of 47 patients. Med Baltim 2012;91:35e48. | Retrospective chart review | 2000-2007; Cerrahpasa Medical Faculty (Istanbul, Turkey). | 47 subjects with PAI; age 29±8; 41 male.  PAA +/- pulmonary artery thrombus (PAT) (n=34), isolated PAT (n=13).  In PAA group vs PAT group: venous thrombosis (n=25 vs 11); other arterial involvement (n=2 vs 0). | Treatment (overall, and in PAA vs PAT groups :cyclophosphamide (n=41; 32 vs 9), azathioprine (n=2), azathioprine+anticoagulants (n=2; 0 vs 2), prednisolone (n=2).  After induction treatment with cyclophosphamide, azathioprine was the most commonly used maintenance drug (30/35, 89%), followed by interferon (3/35) and colchicine (2/35).  At the end of study, 26 were still using immunosuppressants or CCS, and 9 had no treatment.  Embolization (n=2), lobectomy (n=1), surgical operations (n=2). |
| Zhang X.Pulmonary involvement in patients with Behcet’s  disease: report of 15 cases. Clin Respir J 2014. | Retrospective chart review | 2000-2013; Beijing, China. | 9 subjects with PAI (hemoptysis); age 40 (25-55); 6 male.  6 occurred at time of BD diagnosis. | CCS + cyclophosphamide (8/9); CCS alone (n=1). |
| **Pseudoaneurysm** |  |  |  |  |
| [Balcioglu O](https://www.ncbi.nlm.nih.gov/pubmed/26321000). Endovascular Repair and Adjunctive Immunosuppressive Therapy of Aortic Involvement in Behçet's Disease. Eur J Vasc Endovasc Surg. 2015 Nov;50(5):593-8. doi: 10.1016/j.ejvs.2015.07.011. | Retrospective OS. | 2002-2012. | 9 subjects with abdominal or thoraco- abdominal aortic pseudoaneurysm; age 41 (33-60) years; 8 male.  Infrarenal pseudoaneurysms (n=6); suprarenal pseudoaneurysms (n=3). | Immunosuppressive therapy with oral prednisolone (60 mg/day) and cyclophosphamide (200 mg/day) for 2 weeks or more before endovascular stent grafting, and intravenous hydrocortisone (200 mg/day) combined with cyclophosphamide (200 mg/day) for 3 days after the procedure. Thereafter, oral immunosuppressive therapy was continued for 2 years. |
| Kwon Koo B. Endovascular therapy combined with  immunosuppressive treatment for pseudoaneurysms in patients with Behcet’s disease. J Endovasc Ther 2003; 10:75 – 80. | Retrospective OS | 1998-2001; Seoul, Korea | 9 subjects with arterial pseudoaneurysm ; age 36 ±5; 8 male.  Mean follow-up: 24 ±14 months. | Endovascular treatment of the 11 arterial pseudoaneurysm: Balloon-expandable Jostent stent-graft (n=7) or self-expanding Wall- stent (n=1) or custom-designed Z-type stent-grafts (n=3).  +  Immunesuppressive treatment before endovascular therapy (8/9): prednisone (60mg/day) +/- azathioprine. |
| **Others** |  |  |  |  |
| Saadoun D. Long-term outcome of arterial lesions in Behçet disease: a series of 101 patients. Medicine 2012;91:18–24.[doi:10.1097/MD.0b013e3182428126](http://dx.doi.org/10.1097/MD.0b013e3182428126) | Retrospective OS | 1976-2009; Groupe Hospitalier Hospitalier Pitie-Saletriere (Paris, France). | 110 subjects with arterial involvement; age 33 (27-41); 93 male.  148 arterial lesions (101 isolated, 47 multiple).  Type of lesions: aneurysm (n=70), occlusion (n=54), stenosis (n=20), aortitis (n=4).  Site of lesion: femoral (n=23), pulmonary (n=21), iliac (n=20), abdominal aorta (n=17), popliteal (n=15), tibial (n=10), thoracic aorta (n=8), coronary (n=6), upper limb (n=5), cerebral (n=4), coeliac trunk (n=4), renal (n=4), mesenteric (n=4), other (n=7).  Inflammatory markers elevated in 85.1% (86/101). | CCS (87/101; 1mg/kg/day, then tapered to 0.5mg/kg/day at 2 months and <=10mg/day at 6 months) +/- immunosuppressants (79/101; mainly iv cyclosphosphamide (6 pulses of 1 g monthly) continued with azathioprine (2.5 mg/kg/day); median time 2 years) +/- aspirin (44/101) or anticoagulants (47/101).  Surgery (47/101), embolization (3/101), endovascular aortic repair (1/101). |
| Uzun O. Pulmonary involvement in Behçet’s disease. Respiration 2008;75:310e21. | Retrospective OS. | Turkery. | 15 subjects (one no ISGC) and pulmonary involvement; 13 male; age 17-50 (mean age 32).  Macroscopic PAA (n=5, 3 + thrombi), macroscopic thrombi (n=6), microscopic vascular disease (n=3), infection of pulmonary cryptococcosis (n=1, + aneurysmatic dilatation of cerebral arteries) (not considered).  7 occurred at time of BD diagnosis. | Treatment for PAA:  colchicine + CCS+ cyclophosphamide (n=2);  colchicine + CCS (n=2); colchicine + CCS+ cyclophosphamide + embolization factor VII (n=1).  Treatment for thrombi:  colchicine + CCS+ enoxaparin (n=1);  colchicine + CCS+ enoxaparin + warfarin (n=3);  CCS+ enoxaparin + warfarin (n=1);  streptokinase + CCS + cyclophosphamide (n=1).  Treatment for microscopic vascular disease:  CCS + cyclophosphamide (n=1); colchicine + CCS+ enoxaparin + warfarin (n=1); colchicine + aspirin (n=1). |
| **VENOUS AND/OR ARTERIAL** |  |  |  |  |
| Tohmé A. Vascular manifestations of Behçet’s disease. Eighteen cases among 140 patients. Jt  Bone Spine 2003;70:384e9. | Retrospective chart review. | 1980 – 2000; Hôtel- Dieu de France Hospital in Beirut. | 18 subjects with vascular involvement; age 33±7 at diagnosis of vascular manifestation; 13 male.  Thrombophlebitis: 13/18 (saphenous vein (n=2), femoral (n=2), popliteal (n=5), brachiocephalic trunk (n=1), subclavian (n=1), SVC (n=2), hepatic (n=2, Budd-Chiari syndrome), IVC (n=1), cerebral (n=1)).  Arterial lesion: 6/18 (radial aneurysm (n=1), subclavian artery occlusion (n=1), coronary occlusion (n=1), renal arteries stenosis (n=1), femoral, tibial and peroneal arteries stenosis (n=1), cerebral artery thrombosis (n=3)).  7 occurred at time of BD diagnosis; 11 occurred 3-15 years after it. | Treatment in only venous involvement: colchicine + anticoagulants (n=5); colchicine + CCS+ anticoagulants (n=2, one then colchicine + CCS+ chlorambucil + anticoagulants); colchicine + CCS+ cyclophosphamide + anticoagulants (n=4);  colchicine + CCS (n=1).  Treatment in arterial (+/- venous) involvement:  colchicine + CCS+ chlorambucil + anticoagulants (n=3, one plus surgery); colchicine + CCS+ anticoagulants (n=3). |
| Geri G. Spectrum of cardiac lesions in Behçet disease: a series of 52 patients and review of the literature. Medicine (Baltimore). 2012 Jan;91(1):25-34. doi: 10.1097/MD.0b013e3182428f49. | Chart review | 1999-2010; Pitie-  Salpetriere Hospital, Paris, France | 52 subjects with cardiac involvement; age 29.3±10.3 years; 45 male.  Pericarditis (n=20); endocardium involvement (n=14); intracardiac thrombosis (n=10); myocardial infarction (n=9); endomyocardial fibrosis (n=4), others (n=3). | Colchicine (n=46), CCS (n=39), oral anticoagulants (n=14), immunosuppressants (n=31), low-dose aspirin (n=8).  Surgical treatment (n=8) |

**Supplementary table 2:** Main findings reported in the included studies.

| **First author, Title, Journal. Year, Reference** | **Outcomes and Results** |
| --- | --- |
| **VENOUS** |  |
| **Deep venous thrombosis (DVT)** |  |
| Ahn JK. Treatment of venous thrombosis associated with Behcet’s disease: immunosuppressive therapy alone versus immunosuppressive therapy plus anticoagulation. Clin Rheumatol 2008;27:201–5.[doi:10.1007/s10067-007-0685-z](http://dx.doi.org/10.1007/s10067-007-0685-z) | Recurrence of venous thrombosis:6/37.  12.5% (2/16) vs 5.9% (1/17) vs 75% (3/4) (group 1 vs 2; p=0.601).  All 6 patients with recurrence were male, with elevated CRP at time of recurrence. |
| Alibaz-Oner F. Behçet disease with vascular involvement: effects of different therapeutic regimens on the incidence of new relapses. Medicine 2015;94:e494.[doi:10.1097/MD.0000000000000494](http://dx.doi.org/10.1097/MD.0000000000000494) | Relapses in DVT:  86/260; median time 26 (1-252) months.  Of relapsing subjects, 16.3% only on anticoagulants, 32.6% untreated.  Relapse rate was: significantly lower in subjects taking immunosuppressants (25.3% vs 85.7%, p<0.001): significantly higher in those taking only anticoagulants (91.6% vs 29.1%, p<0.001); similar among those treated with only immunosuppressants vs anticoagulants+immunosuppressants (29.1% vs 22.4%, p=0.28).  Second relapse in 17 subjects. Rate of second relapse was: similar among subjects treated with only immunosuppressants vs anticoagulants+immunosuppressants (25.3% vs 20.8%, p=0.93).  Third relapse in 3 subjects.  At multivariate analysis: relapse was negatively associated with only immunosuppressants.  Safety: minor hemorrhage (n=7). No major adverse events. |
| **Deep or superficial venous thrombosis (DVT and/or SVT)** |  |
| Desbois AC. Immunosuppressants reduce venous thrombosis relapse in Behçet’s disease. Arthritis Rheum 2012;64:2753–60.[doi:10.1002/art.34450](http://dx.doi.org/10.1002/art.34450) | Death: 18 subjects.  Factors associated with lower mortality:  lower limbs thrombosis (HR 0.1 (0.07 – 0.53)).  Factors associated with higher mortality: Budd-Chiari syndrome (HR 9.39 (2.05 – 43.07); cardiac involvement (3.67 (1.17 – 11.55)).  Thrombosis relapse: 36.5% (95% CI 29.2 – 44.8) at 5 years, 46.4% (38.1 – 54.3) at 10 years, 55.3% (45.6 – 63.9) at 20 years.  100/296 subjects had at least 1 relapse.  Factors associated with lower risk of relapse: CCS treatment (adjusted HR 0.62 (0.40 – 0.97)); immunosuppressants (0.27 (0.14 – 0.52)).  Factors associated with higher risk of relapse: neurologic involvement (adjusted HR 2.07 (1.36 – 3.15)). |
| Emmi G. Adalimumab-Based Treatment Versus Disease-Modifying Antirheumatic Drugs for Venous Thrombosis in Behçet's Syndrome: A Retrospective Study of Seventy Patients With Vascular Involvement. [Arthritis Rheumatol.](https://www.ncbi.nlm.nih.gov/pubmed/29676522) 2018 Apr 20. doi: 10.1002/art.40531. | Vascular response (defined as clinical and instrumental resolution of thrombosis): 34/35 vs 23/35 (p=0.001). Among subjects with: initial SVT only: 3/4 vs 3/7 (p=0.545); initial DVT: 13/17 vs 4/12 (p=0.029).  Mean time to vascular response: 3.7 ± 1.7 vs 6.3 ±1 1.2 weeks (p<0.0001).  Mean prednisone dose at last follow-up: 3.6±3.4 vs 8.3±3.7 mg/day (p<0.0001); mean decrease: 20.4 ± 13.1 vs 17.7 ± 20.3 mg/day (p=0.20).  Mean prednisone dose for isolated vascular involvement at last follow-up: 4.3±3.8 vs 10.2±4.6 mg/day (p=0.002); mean decrease: 20.0±15.4 vs 19.1±17.2 mg/day (p=0.908).  Time on treatment: significantly longer in the ADA+/- DMARDs vs only DMARDs groups (log-rank test p=0.001), in the ADA+DMARDs vs only DMARDs groups (p=0.002), and in the only ADA vs only DMARDs groups (p=0.051).  Treatment discontinuation: 9/35 subjects vs 27/35. Discontinuation for loss of vascular or non-vascular efficacy: 6/35 vs 17/35 (p=0.01); for loss of vascular efficacy: 3/35 vs 14/35.  Mean time to vascular relapse: 33.7±9.1 vs 29.9±24.4 months.  Response rate and time on treatment were comparable among subjects with or without concomitant anticoagulants.  Safety profile of ADA: Herpes Zoster virus reactivation (n=1), pneumonia (n=1), generalised skin rash (n=2). |
| **Vena cava thrombosis (VCT)** |  |
| [Hamzaoui A](https://www.ncbi.nlm.nih.gov/pubmed/24598446). Vena cava thrombosis in Behçet's disease. [Anadolu Kardiyol Derg.](https://www.ncbi.nlm.nih.gov/pubmed/24598446) 2014 May;14(3):292-3. doi: [10.5152/akd.2014.5042](http://dx.doi.org/10.5152/akd.2014.5042). | 8 subjects lost during follow-up.  Good outcome in 12 subjects; extension in 4 cases. |
| **Budd-Chiari syndrome (BCS)** |  |
| Seyahi E. An outcome survey of 43 patients with  Budd-Chiari syndrome due to Behçet’s syn-  drome followed up at a single, dedicated  center. Semin. Arthritis Rheum 2015; 44: 602-9 | Group 1: patients with resolved ascites (11/12); caudate lobe hypertrophy (n=8), splenomegaly (n=5), esophageal varices (n=5), portal vein dilataion (n=3).  Recanalization of thrombi at the hepatic segment (3/10); of hepatic vein thrombosis (4/21).  New hepatic vein thrombosis (n=2).  Multiple intrahepatic veno-venous collaterals (9/12).  Group 2: hepatomegaly (n=1).  Recanalization of thrombi at the hepatic segment of the IVC (3/5); of hepatic vein (1/8).  New hepatic vein thrombosis (n=2).  Profuse intrahepatic veno-venous collaterals (6/9).  Mortality: 20/43 died, after a median time to BCS diagnosis of 10 (5-33) months. Mortality was significantly higher in Group 1 than Group 2 (58% vs 10%, p=0.011).  Factors associated with increased mortality: ascites (18/20 vs 12/23, p=0.009) esophageal varices (14/16 vs 6/15, p=0.009), thrombosis in all three hepatic veins (8/18 vs 3/23, p=0.036), or at the hepatic segment of the IVC (16/18 vs 14/23, p =0.075), caudate lobe hyperthropy (7/18 vs 3/23, p=0.07), and no immunosuppressive treatment within 6 months from diagnosis (13/20 vs 22/23, p=0.017).  Anticoagulants or thrombolytic therapy was Not associated with reduced mortality (6/20 vs 8/23, p=0.739). |
| Seyahi E. Infliximab in the treatment of hepatic  vein thrombosis (Budd-Chiari syndrome) in three patients with Behcet’s  syndrome. Rheumatology 2007; 46:1213 – 1214 | Case 1: 10 days following treatment start, abundant haemoptysis requiring lobectomy. 2 months later (still under treatment), signs of hepatic encephalopathy, extension of thrombosis to all three hepatic veins. Added infliximab (5mg/kg), died 4 weeks laters.  Case 2: liver failure after 6 months; extension of thrombosis to the IVC, formation of new thrombus in the brachiocephalic vein. Started infliximab (3mg/kg)+1 g methyl prednisolone. Hepatic encephalopathy the following day, died 3 weeks later.  Case 3: at day 4, perfusion papilloedema had disappeared, but unchanged Doppler USG findings. Administered three pulses of 1 g methylprednisolone followed by prednisolone (1mg/kg/day). After 2nd infusion of infliximab, severe headache and diplopia; presence of bilateral papilloedema and cranial sinus thrombosis. The thrombus in the IVC had regressed. Infliximab was stopped, started cyclophosphamide 1g/month. After 6 months, no papilloedema, ascites had disappeared, regression of thrombi in the hepatic vein and IVC. |
| **Intracardiac thrombus (ICT)** |  |
| Ben Ghorbel I. Intracardiac thrombus in Behçet's disease. [Reumatismo.](https://www.ncbi.nlm.nih.gov/pubmed/27981817) 2016 Dec 16;68(3):148-153. doi: [10.4081/reumatismo.2016.887](http://dx.doi.org/10.4081/reumatismo.2016.887). | Case 1: after 4 months, complete resolution of the ICT and biventricular dilatation, impaired LVEF of 38%. No recurrence after 2 years.  Case 2: after 24 months, persistence of a calcified right  intra ventricular thrombus and regression  of aneurysms; symptoms-free.  Case 3: 3 years after pulmonary embolism, recurrent  right auricular thrombus. Diagnosed with BD. At 3 months: compete resolution of ICT. At 6 years, no recurrence.  Case 4: after 6 years, persistent intra auricular thrombus; symptomatic with mild hemoptysis, chronic heart failure, persistent right intra auricular thrombus. Refused thrombectomy, died 4 years later.  Case 5: persistent intra auricular thrombus; superior  vena cava thrombosis. Refused surgery, died of massive hemoptysis after 3 years.  Case 6: symptomatic with hemoptysis and persistence of cardiac thrombus. Underwent thrombectomy. 4 months later, thrombus recurrence (changed treatment). At 12 months, complete resolution of intraventricular thrombi and decrease in PAA. Still asymptomatic at 10 years.  Case 7: improvement of the size of the aneurysm, complete  resolution of right ventricular thrombus.  Case 8: after one year, ischemic stroke and recurrence of right intraventricular thrombus (multiple thrombosed PAA, and inferior vena cava thrombosis). After new treatment: complete resolution within 24 months. |
| Wang H. Intracardiac thrombus in patients with Behcet's disease: clinical correlates, imaging features, and outcome: a retrospective, single-center experience. Clin Rheumatol. 2016 Oct;35(10):2501-7. doi: 10.1007/s10067-015-3161-1. | In the 2 subjects with surgery, followed by warfarin, prednisone, and cyclophosphamide: no reoccurrence.  In the subject with surgery, followed by aspirin: reoccurrence after 3 months; diagnosed with BS, treated with warfarin, prednisone, cyclophosphamide, and thalidomide: reoccurrence after 27 months, following prednisone and immunesuppressants tapering.  In the 9 subjects with first line anticoagulant + immunosuppressants + CCS: no reoccurrence; complete resolution in 7/9. |
| **Cerebral venous thrombosis (CVT)** |  |
| Saadoun D. Cerebral venous thrombosis in Behçet’s disease. Arthritis Rheum 2009;  15(61):518e26. | Short-term outcome (regression and/or disappearance of neurologic symptoms within 1 month): 56/64 (87.5%).  Total sinus recanalization: 33/57.  Sequelae of CVT: 23/64. Proportion was comparable in subjects treated with only anticoagulants vs anticoagulants+immunosuppressants (p=0.15).  Univariate HR of sequelae (Ref=no considered treatment): anticoagulants (0.62 (0.01 – 50.13)), aspirin (0.77 (0.23 – 2.59)), immunosuppressants (2.15 (0.66 - 7.30)), steroids (0.57 (0.11 – 2.83)), colchicine (0.62 (0.01 – 50.13)).  Relapse of thrombosis: 20/64 (31.20%); 7/20 had a relapse of CVT (6 of them had discontinued warfarin). Treatments at time of relapse: CCS (n=6, 10-30 mg/day), azathioprine (n=3).  Proportion of relapse was comparable in subjects treated with only anticoagulants vs anticoagulants+immunosuppressants (p=0.19)  Univariate HR of relapse (Ref=no considered treatment): anticoagulants (0.73 (0.01 – 5.49)), aspirin (0.82 (0.32 – 2.09)), immunosuppressants (2.42 (0.93 - 6.30)), steroids (1.11 (0.32 – 3.80)), colchicine (0.49 (0.06 – 3.81)).  Timing of relapse: 4 within 1 year, 11 at 3 years, 15 at 5 years, 19 at 10 years, 20 at 20 years.  Safety: hemorrhagic complications (n=4). |
| Shi J. Cerebral venous sinus thrombosis in Behçet's disease: a retrospective case-control study. [Clin Rheumatol.](https://www.ncbi.nlm.nih.gov/pubmed/28612244) 2018 Jan;37(1):51-57. doi: [10.1007/s10067-017-3718-2](http://dx.doi.org/10.1007/s10067-017-3718-2). | Remission: 18/21. Resolution of headache: all. Visual loss recovery: 6/10.  CVST flares: 3 within 24 months (all achieved remission after re-treatment).  No deaths. |
| Uluduz D. Behçet's disease as a causative factor of cerebral venous sinus thrombosis: subgroup analysis of data from the VENOST study. Rheumatology (Oxford). 2018 Jul 9. doi: 10.1093/rheumatology/key153. | modified Rankin Score (mRS):  At first month: mRS 0-1 (86.7%), 2 (7.1%), ≥3 (6.1%). At third month: mRS 0-1 (92.3%), 2 (4.4%), ≥3 (3.3%). At sixth month: mRS 0-1 (95.5%), 2 (1.1%), ≥3 (3.4%). At 12th month: mRS 0-1 (96.6%), 2 (0%), ≥3 (3.4%). |
| **ARTERIAL** |  |
| **Pulmonary arterial involvement (PAI)** |  |
| Hamuryudan V. Pulmonary arterial aneurysms in Behçet’s syndrome: a report of 24 cases. Br J Rheumatol 1994;33:48–51.[doi:10.1093/rheumatology/33.1.48](http://dx.doi.org/10.1093/rheumatology/33.1.48) | Deaths and time to death:  4/4 (less than one month after surgery)  vs  1/1 (1 month)  vs  1/7 (1 lost during follow-up; dead 27 months)  vs  5/10 (1 lost during follow-up; 2-36 months)  vs  1/2 (10 months). |
| Hamuryudan V. Pulmonary artery aneurysms in Behçet syndrome. Am J Med 2004;117:867–70.[doi:10.1016/j.amjmed.2004.05.027](http://dx.doi.org/10.1016/j.amjmed.2004.05.027) | Death: 6/26 (4 within 1 year).  Haemoptysis recurrence during azathioprine (n=3). Recurrent haemoptysis requiring embolization (n=2). |
| Hamuryudan V. Pulmonary artery involvement in Behçet׳s syndrome: Effects of anti-Tnf treatment. Semin Arthritis Rheum 2015;45:369–73.[doi:10.1016/j.semarthrit.2015.06.008](http://dx.doi.org/10.1016/j.semarthrit.2015.06.008) | 2 other subjects developed PAI during anti-TNF treatment (infliximab).  Among the 13 subjects: 6/13 still on treatment, all with clinical remission, and regressed or completely normal thorax CT findings.  4/13 stopped anti-TNF after achievement of clinical response and regression of radiologic findings.  Relapses following anti-TNF discontinuation: 2/4 (both stopped also azathioprine; 1 mesenteric vein thrombosis, 1 hemoptysis with new PAT).  Lost during follow-up:1/13 (information from another center: good response; stopped infliximab for gastrointestinal involvement, had new PAT).  Early withdrawal of anti-TNF: 2/13 (due to serious infections). |
| Seyahi E. Pulmonary artery involvement and associated lung disease in Behçet disease: a series of 47 patients. Med Baltim 2012;91:35e48. | 3 subjects with isolated PAT developed PAA during follow-up: 2 were treated with azathioprine, 1 with cyclophosphamide.  Recurrence of PAI (n=9), while treatment with cyclosphorine (n=3), azathioprine (n=5), or no treatment (n=1).  Safety: 9 subjects stopped azathioprine due to side effects (cytopenia, rash or gastric pain (n=6) or relapse (n=3)).  Mortality: 12/47 (26%) died; major cause of death was massive hemoptysis (7/12). Mortality in PAA vs PAT groups: 26% (9/34) vs 23% (3/13). |
| Zhang X.Pulmonary involvement in patients with Behcet’s  disease: report of 15 cases. Clin Respir J 2014. | 5/9 dead after 4 – 30 months (3 due to hemoptysis, 1 due to carotid aneurysms rupture). |
| **Pseudoaneurysms** |  |
| [Balcioglu O](https://www.ncbi.nlm.nih.gov/pubmed/26321000). Endovascular Repair and Adjunctive Immunosuppressive Therapy of Aortic Involvement in Behçet's Disease. Eur J Vasc Endovasc Surg. 2015 Nov;50(5):593-8. doi: 10.1016/j.ejvs.2015.07.011. | 1 death at 12 months (non-vascular cause).  No recurrence of aneurysm during a mean follow-up of 40 ± 16 months. |
| Kwon Koo B. Endovascular therapy combined with  immunosuppressive treatment for pseudoaneurysms in patients with Behcet’s disease. J Endovasc Ther 2003; 10:75 – 80. | Complete resolution:8/9 (1 had only 1-month follow-up available).    Recurrence:  Pseudoaneurysm recurrence at the distal margin of the stent graft (n=1; at 9 months; had stopped treatment); Complete occlusion of the stent-graft of the common carotid artery (n=1; at 6 months; had stopped treatment). |
| **Others** |  |
| Saadoun D. Long-term outcome of arterial lesions in Behçet disease: a series of 101 patients. Medicine 2012;91:18–24.[doi:10.1097/MD.0b013e3182428126](http://dx.doi.org/10.1097/MD.0b013e3182428126) | Complete remission: 39/101 (38.6%).  Crude OR of complete remission: surgery (0.71 (0.42 – 5.13)), anticoagulants (1.20 (0.35 – 2.14)), aspirin (1.36 (0.52 – 3.73)), CCS (1.06 (0.45 – 1.97)), immunosuppressants (3.13 (0.88 – 11.05); adjusted OR 3.38 (0.7 – 13.23)).  Annual incidence of arterial events before vs after immunesuppressants: 0.69 vs 0.15 (p<0.001).  Relapses of arterial lesions: 28/101 (27.7%; median time to relapse 13 (3-281) months).  Safety: No hemorrhagic complications under the anticoagulant or antiaggregant therapy. No withdral under CCS or immunosuppressants.  Surgical/embolization complications: 17/50.  Risk of postoperative thrombosis: 75% in absence of anticoagulant vs 40% in treated with anticoagulants.  Postoperative complications: 28.50% among treated with immunosuppressants vs 71.50% among non-treated (p<0.001).  Mortality: 14/101 (median follow-up 7.6 (6.6 – 25.4) years). Causes of death: pulmonary artery aneurysms (n=3), thoracic aortic aneurysm (n=3), sepsis (n=3), cancer (n=1), abdominal aortic aneurysms (n=1), cerebral aneurysms (n=1), myocardial infarction (n=1). |
| Uzun O. Pulmonary involvement in Behçet’s disease. Respiration 2008;75:310e21. | In PAA: 4/5 dead (within 3-20 months, due to massive hemoptysis); 1 alive at 30 months.  In thrombi: 1/6 dead at 2 weeks; 4/6 alive at 7-21 months; 1 lost follow-up.  In microscopic vascular disease:  3/3 alive at 15 months – 7 years. |
| **VENOUS OR ARTERIAL** |  |
| Tohmé A. Vascular manifestations of Behçet’s disease. Eighteen cases among 140 patients. Jt  Bone Spine 2003;70:384e9. | Venous involvement:  Group “colchicine + anticoagulants”: asymptomatic 5/5.  Group “colchicine + CCS+ anticoagulants”: relapse 1/2; asymptomatic 1/2.  Group “colchicine + CCS+ cyclophosphamide + anticoagulants”: asymptomatic 3/4 , lost to follow-up 1/4.  Group “colchicine + CCS”: asymptomatic 1/1.  Arterial (+/- venous) involvement:  Group “colchicine + CCS+ chlorambucil + anticoagulants”: asymptomatic 1/3, intermittent claudication 1/3, hypertension 1/3.  Group “colchicine + CCS+ anticoagulants”: hemiparesis 2/3, asymptomatic 1/3. |
| Geri G. Spectrum of cardiac lesions in Behçet disease: a series of 52 patients and review of the literature. Medicine (Baltimore). 2012 Jan;91(1):25-34. doi: 10.1097/MD.0b013e3182428f49. | Complete remission: n=24 (46.1%); partial remission: n=20 (38.5%).  Death: 8 (15.4%).  Relapse of BS cardiac involvement: 8 (15.4%)  Factors associated with complete remission: anticoagulants (p=0.01). |
